# Supplementary material for: Cellulose-based slippery covalently attached liquid surfaces for synergistic rain and solar energy harvesting
Source: Royal Society of Chemistry journal article supplement (doi:10.1039/d2nr07118e), 2023-01-01
Supplement: d2nr07118e1.pdf [file d2nr07118e1.pdf]

## Supporting Information

# Cellulose-based slippery covalently attached liquids surfaces for synergistic rain and solar energy harvesting

*Zhixiang Chen*<sup>a, b, \*</sup>, *Yi Lu*<sup>b, d</sup>, *Rogério Manica*<sup>b</sup>, *Jingqiao Li*<sup>a</sup>, *Qingxia Liu*<sup>a, b, c</sup>

<sup>a</sup> Ju Long College, Shenzhen Technology University, Shenzhen 518118, P. R. China

<sup>b</sup> Department of Chemical and Materials Engineering, University of Alberta, Edmonton, AB T6G 1H9, Canada

<sup>c</sup> College of New Materials and New Energies, Shenzhen Technology University, Shenzhen 518118, P. R. China

<sup>d</sup> Bioproducts Institute, Department of Chemical and Biological Engineering, University of British Columbia, 2360, East Mall, Vancouver, BC V6T 1Z3, Canada

Corresponding author: Prof. Zhixiang Chen

Email: [chenzhixiang@sztu.edu.cn](mailto:chenzhixiang@sztu.edu.cn)

Address: Ju Long College, Shenzhen Technology University, Shenzhen 518118, P. R. China

## Figures

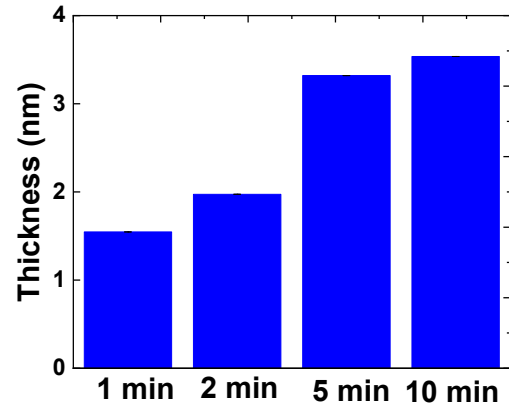

**Fig. S1.** PDMS layer thickness under different treatment time

## Table

**Table S1** Thickness, Transmittance (at 550 nm) and Tensile Properties for CAF, PDMS@CAF

|          | Thickness<br>( $\mu\text{m}$ ) | Transmittance at<br>550 nm | Young<br>Modulus<br>(MPa) | Tensile<br>stress at<br>break<br>(MPa) | Tensile<br>strain at<br>break<br>(%) |
|----------|--------------------------------|----------------------------|---------------------------|----------------------------------------|--------------------------------------|
| CAF      | $196 \pm 7$                    | 87                         | $2.1 \pm 0.4$             | $56.2 \pm 9.2$                         | $80.63 \pm 7.7$                      |
| PDMS@CAF | $196 \pm 7$                    | 92                         | $2.1 \pm 0.2$             | $57.4 \pm 8.0$                         | $78.35 \pm 8.9$                      |

## Method

### Method S1<sup>[1]</sup>

The samples were horizontally placed in a Petri dish with a quartz cover. Approximately  $20 \mu\text{L cm}^{-2}$  of silicone (PDMS) oil was then dropped to cover the entire sample surface and uniform coverage was achieved by tilting the sample. The samples were illuminated by UV (Hg) lamp at 400 W (Noblelight DQ2523, Heraeus, Germany). The emission maxima of this lamp are in the UV range, that is,  $\lambda = 320$  and  $370$  nm. The working distance between the lamp and the sample was 15 cm. The UV light power density was measured using a 1830-C Newport optical power meter equipped with a 818-UV/DB optical power detector and 1% Newport ND filter. The power density at the working distance is  $\approx 50 \text{ mW cm}^{-2}$ . To measure the WCA and hysteresis on UV-grafted PDMS layers, the remnant oil was dissolved by extensive rinsing in toluene, and then dried under a stream of  $\text{N}_2$ .

### References

[1] A.B. Tesler, L.H. Prado, M.M. Khusniyarov, I. Thievessen, A. Mazare, L. Fischer, S. Virtanen, W.H. Goldmann, P. Schmuki, A one-pot universal approach to fabricate lubricant-infused slippery surfaces on solid substrates, *Advanced Functional Materials* 31(27) (2021) 2101090.
